# Supplementary material for: Synergistic toxicity in an in vivo model of neurodegeneration through the co-expression of human TDP-43M337V and tauT175D protein
Source: PubMed Central journal article supplement (PMC6839082; doi:10.1186/s40478-019-0816-1), 2019-11-08

A

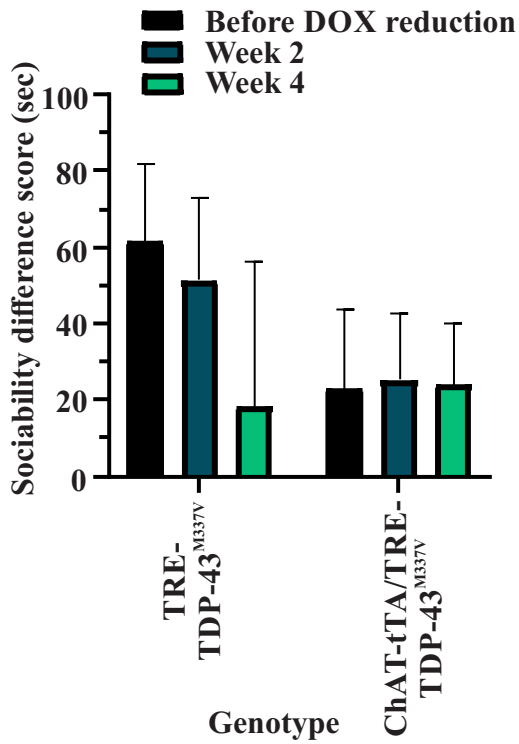

B

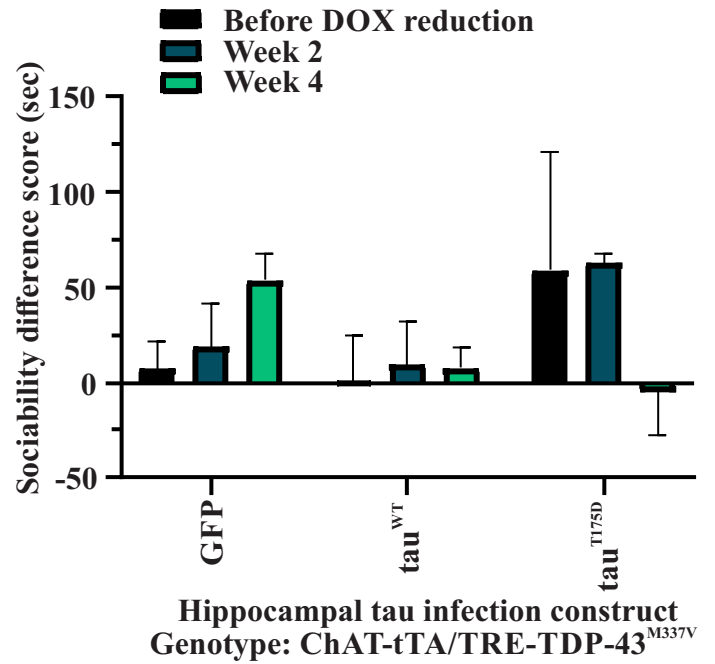

C

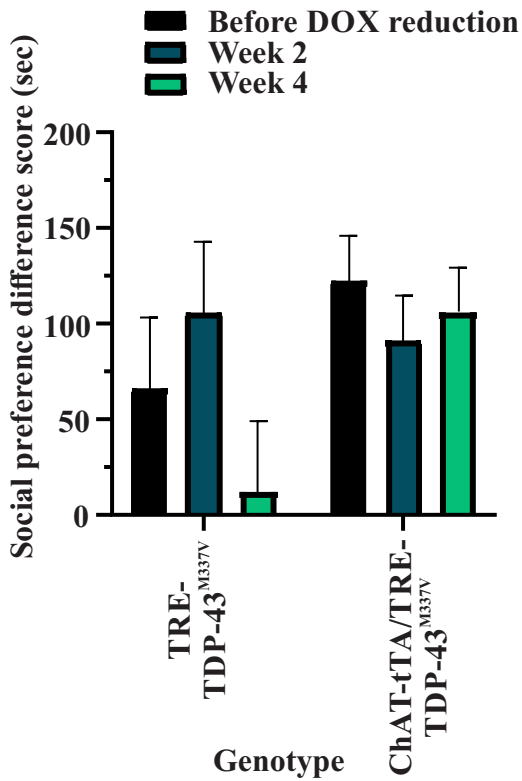

D

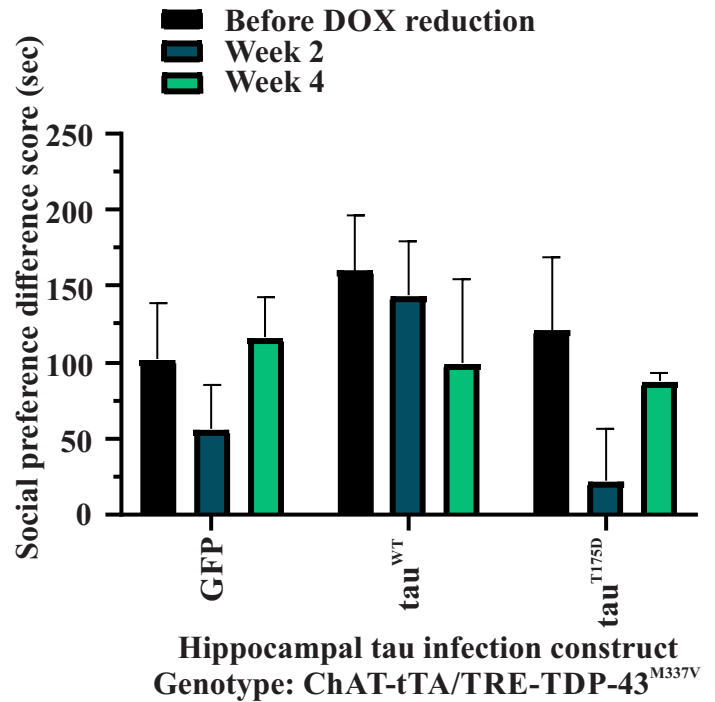

Supplement: 40478_2019_816_MOESM6_ESM.pdf [file 40478_2019_816_MOESM6_ESM.pdf]
