# Supplementary material for: Synergistic toxicity in an in vivo model of neurodegeneration through the co-expression of human TDP-43M337V and tauT175D protein
Source: Springer Nature journal article supplement (doi:10.1186/s40478-019-0816-1), 2019-11-08

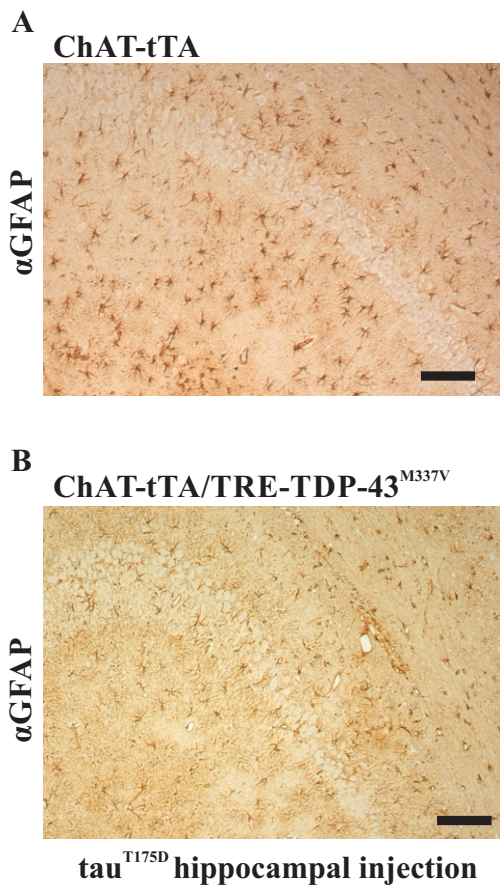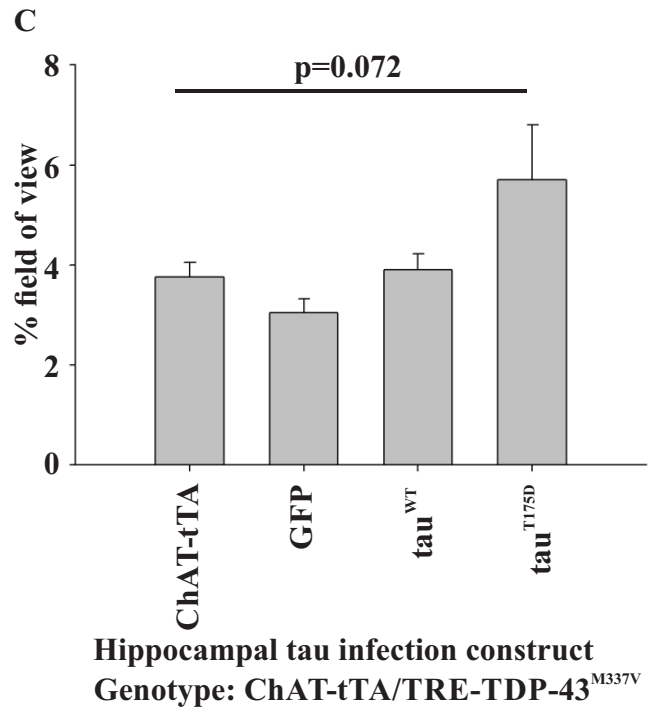

Supplement: MOESM2 [file 25666952]
